# Supplementary material for: A qualitative study on the influencing factors of therapeutic inertia behavior in patients with type 2 diabetes in the cold region of Northeast China
Source: Research Square preprint supplement (doi:10.21203/rs.3.rs-6948413/v1), 2025-08-19
Supplement: Supplementary file 1 [file b81154fbd32f809b4fc85a69.docx]

**Outline of the interview**

| 1.How did you know that you had diabetes? What is your understanding of therapeutic inertia? Could you tell me about the harm to your body caused by the existence of therapeutic inertia? |
| --- |
| 2.What factors do you think are related to the existence of therapeutic inertia? Why? |
| 3.Do you pay attention to your blood sugar management? How often do measure your blood sugar and see a doctor? Why not？ |
| 4.How have you dealt with poor blood sugar control? (Causes, symptoms, coping methods, effects) |
| 5.Do your family members or friends care about your diabetes? What would they do to help you overcome therapeutic inertia? |
| 6.Do you want doctors and nurses to guide you when your blood sugar is poorly controlled? Which way would you like to guide you? |
